# Supplementary material for: sEMG-Based Hand Posture Recognition and Visual Feedback Training for the Forearm Amputee
Source: MDPI journal article supplement (doi:10.3390/s22207984), 2022-10-19
Supplement: s1 [file s1]

## Supplementary Materials

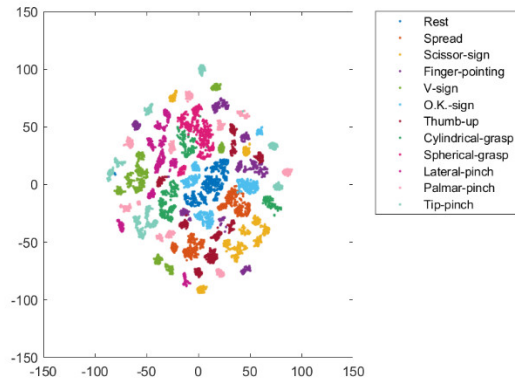

(a)

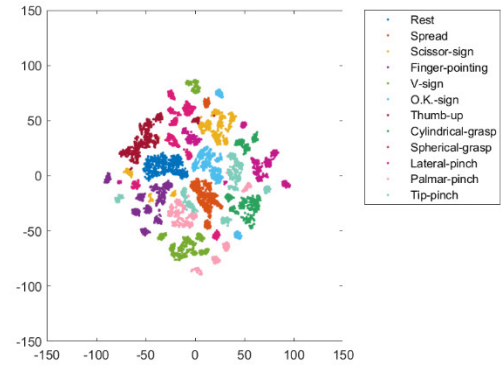

(b)

**Figure S1.** t-SNE visualization of variability in the sEMG signals of a healthy adult (subject 2) (a) Day 1, (b) Day 2.

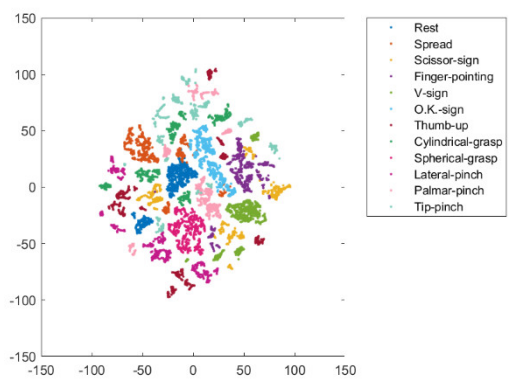

(a)

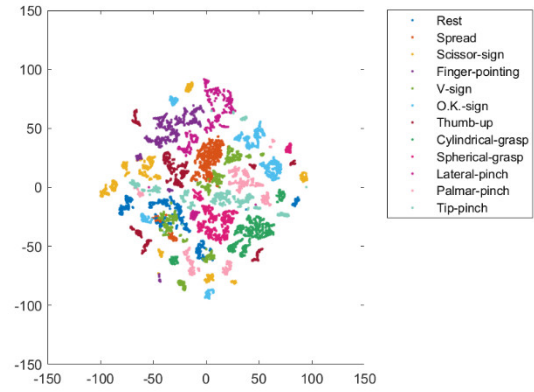

(b)

**Figure S2.** t-SNE visualization of variability in the sEMG signals of a healthy adult (subject 3) (a) Day 1, (b) Day 2.

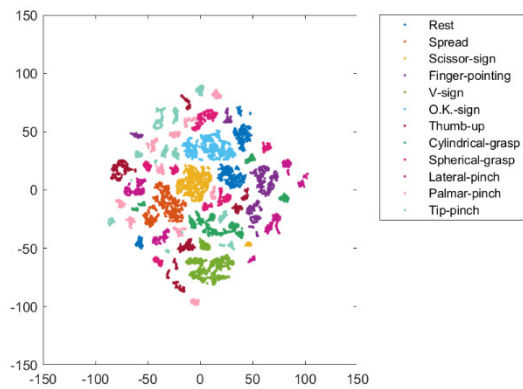

(a)

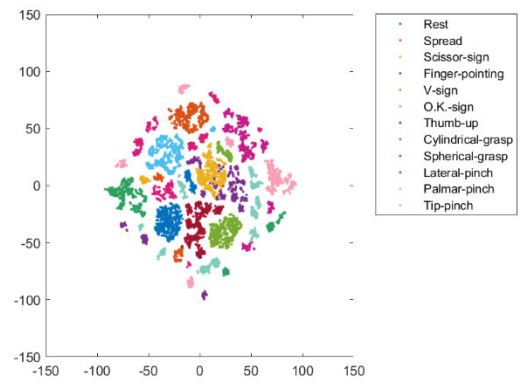

(b)

**Figure S3.** t-SNE visualization of variability in the sEMG signals of a healthy adult (subject 4) (a) Day 1, (b) Day 2.

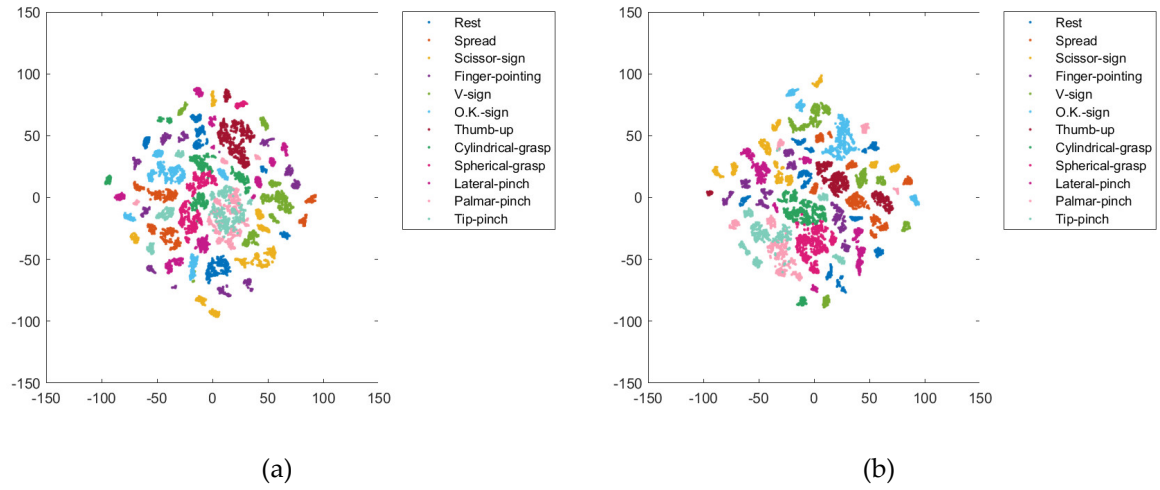

**Figure S4.** t-SNE visualization of variability in the sEMG signals of a healthy adult (subject 5) (a) Day 1, (b) Day 2.

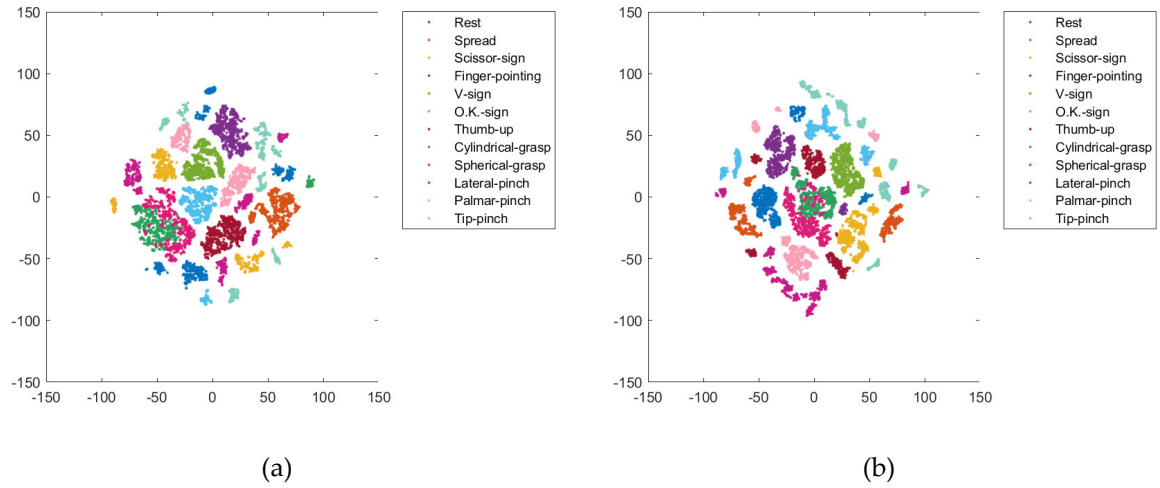

**Figure S5.** t-SNE visualization of variability in the sEMG signals of a healthy adult (subject 6) (a) Day 1, (b) Day 2.

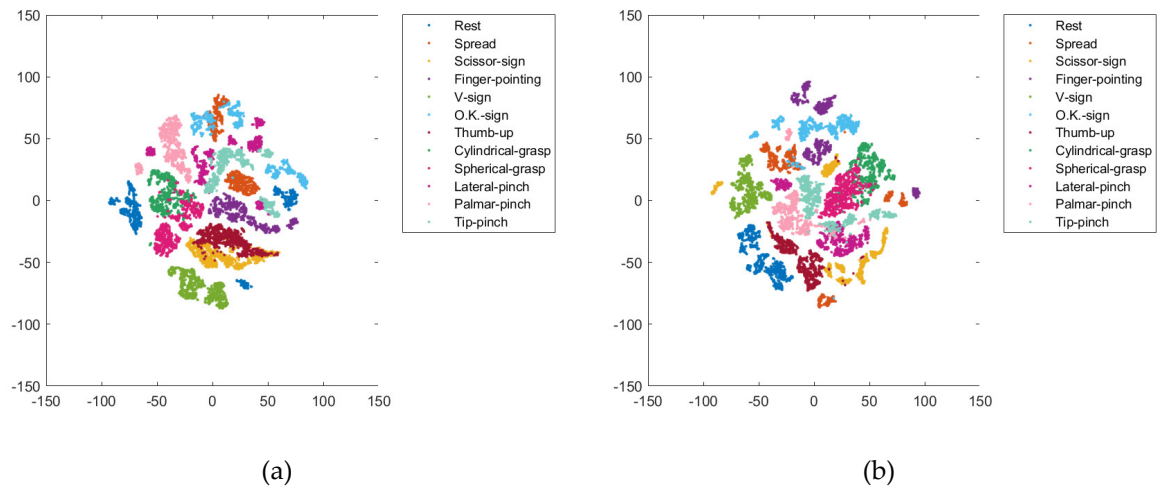

**Figure S6.** t-SNE visualization of variability in the sEMG signals of a healthy adult (subject 7) (a) Day 1, (b) Day 2.

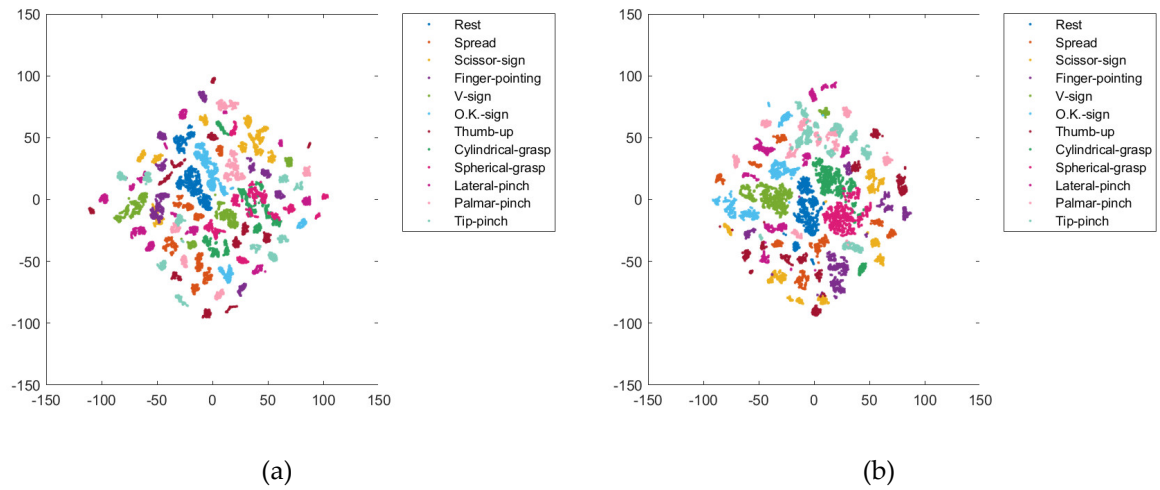

**Figure S7.** t-SNE visualization of variability in the sEMG signals of a healthy adult (subject 8) (a) Day 1, (b) Day 2.

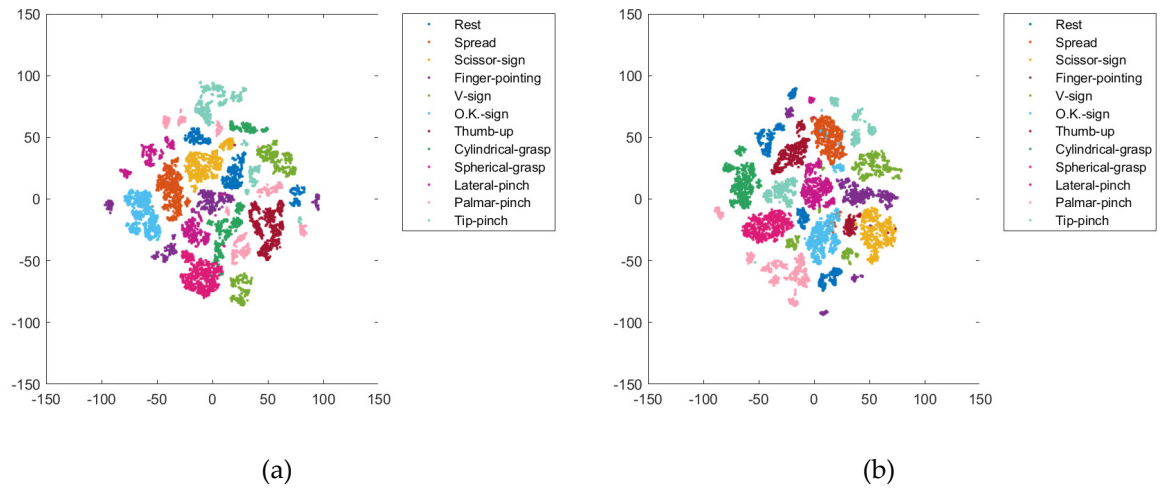

**Figure S8.** t-SNE visualization of variability in the sEMG signals of a healthy adult (subject 9) (a) Day 1, (b) Day 2.

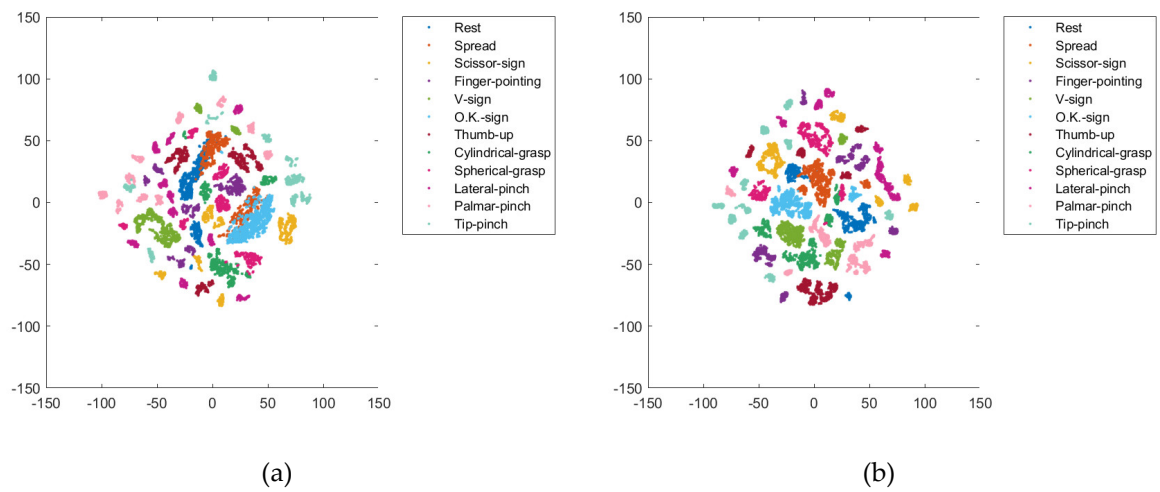

**Figure S9.** t-SNE visualization of variability in the sEMG signals of a healthy adult (subject 10) (a) Day 1, (b) Day 2.
